# Supplementary material
Source: bioRxiv or medRxiv preprint supplement (http://biorxiv.org/highwire/filestream/26727/field_highwire_adjunct_files/0/094847-1.pdf)
Supplement: Supplementary file [file 094847-1.pdf]

## SUPPLEMENTAL MATERIALS

**Table S1. ApiAP2 mRNA expression in Type II strains across *Toxoplasma* life cycle stages.**

**mRNA expression analysis.** Microarray data: ME49 strain tachyzoite and 2 day *in vitro* bradyzoite. RNA-seq data: M4 strain 21 day *in vivo* bradyzoite, 10 day oocyst (sporozoites), CZ-H3 strain tachyzoite and 3 day post-infection of cats (merozoites). All 67 *Toxoplasma* ApiAP2 factors were ranked from highest (rank 1) to lowest (rank 67) level of expression in each sample. The percentile expression indicated in parentheses is included to provide a reference for the relative expression of each ApiAP2 mRNA against all genes expressed in the RNA sample. **The highest levels of mRNA expression for developmental ApiAP2s are indicate by larger bold font.** Column color code: yellow=*in vitro* tachyzoites, green=bradyzoites, red=fully sporulated oocysts containing sporozoites, blue=merozoites, orange=tachyzoite cell cycle regulated ApiAP2s with the highest amplitude ApiAP2 mRNAs indicated as *dynamic cell cycle*. Note: ApiAP2 mRNAs that are transiently expressed are not fully captured particularly dynamic cell cycle factors (e.g. AP2IV-4 75th percentile only S phase-mitosis). For some ApiAP2 factors, mRNA expression has been confirmed at the protein level indicated by (P). Strain-specific differences in expression are evident in some data but were not highlighted.

| AP2 name<br>cell cycle<br>orange | ME49<br>tachy            | ME49<br>2d brady          | M4<br>21d brady           | M4-10d<br>oocyst          | CZ-H3<br>tachy            | CZ-H3<br>3d mero          | Developmental Expression<br>*see additional evidence ToxoDB<br>(P) confirmed at the protein level |
|----------------------------------|--------------------------|---------------------------|---------------------------|---------------------------|---------------------------|---------------------------|---------------------------------------------------------------------------------------------------|
| AP2Ib-1                          | 62 <sup>(11)</sup>       | <b>28</b> <sup>(60)</sup> | 57 <sup>(22)</sup>        | 37 <sup>(33)</sup>        | 63 <sup>(18)</sup>        | <b>21</b> <sup>(53)</sup> | early bradyzoites (P)<br>& feline cycle stages*                                                   |
| AP2III-1                         | 56 <sup>(25)</sup>       | 64 <sup>(15)</sup>        | 65 <sup>(5)</sup>         | 52 <sup>(21)</sup>        | 65 <sup>(8)</sup>         | 62 <sup>(21)</sup>        | no clear stage pattern                                                                            |
| AP2III-2                         | <b>9</b> <sup>(72)</sup> | <b>22</b> <sup>(62)</sup> | <b>24</b> <sup>(66)</sup> | <b>16</b> <sup>(64)</sup> | <b>25</b> <sup>(62)</sup> | 63 <sup>(20)</sup>        | intermediate life cycle (P)<br>& highest in unsporulated oocysts*                                 |
| AP2III-3                         | 67 <sup>(1)</sup>        | 67 <sup>(0)</sup>         | 66 <sup>(5)</sup>         | <b>13</b> <sup>(70)</sup> | 67 <sup>(6)</sup>         | 65 <sup>(15)</sup>        | sporozoite specific                                                                               |
| AP2III-4                         | 66 <sup>(1)</sup>        | 65 <sup>(4)</sup>         | 63 <sup>(11)</sup>        | 31 <sup>(41)</sup>        | 64 <sup>(15)</sup>        | <b>17</b> <sup>(58)</sup> | feline cycle specific                                                                             |
| AP2IV-1                          | 37 <sup>(47)</sup>       | 30 <sup>(53)</sup>        | 40 <sup>(38)</sup>        | <b>11</b> <sup>(72)</sup> | 28 <sup>(55)</sup>        | <b>10</b> <sup>(68)</sup> | highest in feline cycle stages*<br>& oocyst sporulation*                                          |
| AP2IV-2 <sup>+</sup>             | 34 <sup>(48)</sup>       | 29 <sup>(54)</sup>        | 36 <sup>(42)</sup>        | 45 <sup>(27)</sup>        | 59 <sup>(20)</sup>        | 26 <sup>(52)</sup>        | no clear stage pattern                                                                            |
| AP2IV-3                          | 64 <sup>(9)</sup>        | <b>13</b> <sup>(72)</sup> | 33 <sup>(48)</sup>        | <b>6</b> <sup>(91)</sup>  | 58 <sup>(21)</sup>        | <b>7</b> <sup>(71)</sup>  | early bradyzoites (P),<br>sporozoites & merozoites                                                |
| AP2IV-4                          | 33 <sup>(49)</sup>       | 52 <sup>(37)</sup>        | 27 <sup>(61)</sup>        | 28 <sup>(46)</sup>        | 31 <sup>(50)</sup>        | 29 <sup>(49)</sup>        | likely tachyzoite-specific<br><i>dynamic cell cycle</i> (P)                                       |

|                      |                           |                           |                           |                           |                           |                           |                                                                                 |
|----------------------|---------------------------|---------------------------|---------------------------|---------------------------|---------------------------|---------------------------|---------------------------------------------------------------------------------|
| AP2IV-5              | <b>21</b> <sup>(62)</sup> | 49 <sup>(38)</sup>        | 58 <sup>(19)</sup>        | <b>10</b> <sup>(73)</sup> | <b>15</b> <sup>(74)</sup> | 44 <sup>(33)</sup>        | tachyzoites & sporozoites                                                       |
| AP2V-1               | <b>24</b> <sup>(59)</sup> | 37 <sup>(47)</sup>        | 57 <sup>(22)</sup>        | 27 <sup>(48)</sup>        | <b>13</b> <sup>(77)</sup> | 59 <sup>(20)</sup>        | highest in tachyzoites                                                          |
| AP2V-2               | 60 <sup>(21)</sup>        | 63 <sup>(16)</sup>        | 65 <sup>(5)</sup>         | 24 <sup>(49)</sup>        | 45 <sup>(37)</sup>        | 54 <sup>(24)</sup>        | no clear stage pattern                                                          |
| AP2VI-1 <sup>+</sup> | <b>2</b> <sup>(89)</sup>  | <b>3</b> <sup>(87)</sup>  | <b>2</b> <sup>(95)</sup>  | <b>4</b> <sup>(93)</sup>  | <b>6</b> <sup>(86)</sup>  | <b>2</b> <sup>(78)</sup>  | high expression in all stages<br><i>dynamic cell cycle</i> (P)                  |
| AP2VI-2              | 54 <sup>(29)</sup>        | 32 <sup>(50)</sup>        | 34 <sup>(46)</sup>        | <b>18</b> <sup>(59)</sup> | 32 <sup>(50)</sup>        | 33 <sup>(44)</sup>        | highest in unsporulated oocysts*                                                |
| AP2VI-3              | 52 <sup>(30)</sup>        | <b>35</b> <sup>(49)</sup> | 55 <sup>(25)</sup>        | 44 <sup>(27)</sup>        | 49 <sup>(35)</sup>        | <b>5</b> <sup>(72)</sup>  | highly expressed in merozoites &<br>possibly early bradyzoites                  |
| AP2VIIa-1            | 55 <sup>(29)</sup>        | <b>24</b> <sup>(61)</sup> | <b>20</b> <sup>(73)</sup> | <b>3</b> <sup>(93)</sup>  | 52 <sup>(30)</sup>        | 32 <sup>(45)</sup>        | bradyzoites & sporozoites<br><i>dynamic cell cycle</i> (P)                      |
| AP2VIIa-2            | <b>1</b> <sup>(92)</sup>  | <b>2</b> <sup>(89)</sup>  | <b>1</b> <sup>(97)</sup>  | 39 <sup>(32)</sup>        | <b>3</b> <sup>(90)</sup>  | 40 <sup>(38)</sup>        | intermediate life cycle (P)<br>& unsporulated oocysts*                          |
| AP2VIIa-3            | <b>3</b> <sup>(88)</sup>  | <b>5</b> <sup>(85)</sup>  | <b>11</b> <sup>(85)</sup> | <b>2</b> <sup>(95)</sup>  | <b>5</b> <sup>(86)</sup>  | 36 <sup>(40)</sup>        | intermediate life cycle (P)<br>& sporozoites                                    |
| AP2VIIa-4            | <b>19</b> <sup>(63)</sup> | <b>8</b> <sup>(83)</sup>  | <b>21</b> <sup>(71)</sup> | 33 <sup>(38)</sup>        | <b>23</b> <sup>(64)</sup> | <b>16</b> <sup>(59)</sup> | intermediate life cycle (P)<br>& merozoites                                     |
| AP2VIIa-5            | <b>11</b> <sup>(70)</sup> | <b>25</b> <sup>(61)</sup> | 39 <sup>(39)</sup>        | 65 <sup>(06)</sup>        | <b>29</b> <sup>(54)</sup> | 34 <sup>(43)</sup>        | highest in tachyzoites (P)<br>& early bradyzoites                               |
| AP2VIIa-6            | <b>14</b> <sup>(68)</sup> | <b>17</b> <sup>(67)</sup> | 35 <sup>(45)</sup>        | <b>8</b> <sup>(86)</sup>  | 47 <sup>(37)</sup>        | 64 <sup>(20)</sup>        | highest in sporozoites also<br>moderate in tachyzoites (P)/early<br>bradyzoites |
| AP2VIIa-7            | 35 <sup>(48)</sup>        | 44 <sup>(44)</sup>        | 31 <sup>(49)</sup>        | 23 <sup>(51)</sup>        | 27 <sup>(58)</sup>        | 51 <sup>(28)</sup>        | 86th percentile in unsporulated<br>oocysts*                                     |
| AP2VIIa-8            | <b>27</b> <sup>(54)</sup> | <b>18</b> <sup>(65)</sup> | <b>13</b> <sup>(81)</sup> | <b>5</b> <sup>(93)</sup>  | <b>19</b> <sup>(67)</sup> | 66 <sup>(12)</sup>        | intermediate life cycle &<br>sporozoites, <i>dynamic cell cycle</i> (P)         |
| AP2VIIa-9            | 51 <sup>(30)</sup>        | 43 <sup>(45)</sup>        | <b>18</b> <sup>(74)</sup> | 66 <sup>(06)</sup>        | 37 <sup>(47)</sup>        | <b>13</b> <sup>(62)</sup> | mature bradyzoites? &<br>feline life cycle*                                     |
| AP2VIIb-1            | 40 <sup>(43)</sup>        | 36 <sup>(48)</sup>        | 43 <sup>(37)</sup>        | 22 <sup>(52)</sup>        | 39 <sup>(42)</sup>        | 41 <sup>(30)</sup>        | no clear stage pattern                                                          |

|                      |                           |                           |                           |                           |                           |                           |                                                                              |
|----------------------|---------------------------|---------------------------|---------------------------|---------------------------|---------------------------|---------------------------|------------------------------------------------------------------------------|
| AP2VIIb-2            | 53 <sup>(29)</sup>        | 50 <sup>(37)</sup>        | 41 <sup>(38)</sup>        | 17 <sup>(60)</sup>        | 44 <sup>(37)</sup>        | 22 <sup>(52)</sup>        | no clear stage pattern                                                       |
| AP2VIIb-3            | <b>12</b> <sup>(69)</sup> | <b>9</b> <sup>(81)</sup>  | <b>8</b> <sup>(86)</sup>  | 42 <sup>(27)</sup>        | <b>22</b> <sup>(64)</sup> | 42 <sup>(37)</sup>        | intermediate life cycle (P)                                                  |
| AP2VIII-1            | 39 <sup>(44)</sup>        | 48 <sup>(38)</sup>        | 50 <sup>(30)</sup>        | 58 <sup>(16)</sup>        | 36 <sup>(46)</sup>        | 48 <sup>(30)</sup>        | no clear stage pattern                                                       |
| AP2VIII-2            | 41 <sup>(43)</sup>        | 54 <sup>(36)</sup>        | 38 <sup>(40)</sup>        | 49 <sup>(24)</sup>        | 46 <sup>(36)</sup>        | 47 <sup>(30)</sup>        | no clear stage pattern                                                       |
| AP2VIII-3            | <b>10</b> <sup>(71)</sup> | <b>14</b> <sup>(70)</sup> | <b>19</b> <sup>(73)</sup> | <b>12</b> <sup>(70)</sup> | <b>21</b> <sup>(64)</sup> | 18 <sup>(56)</sup>        | intermediate life cycle & sporozoites                                        |
| AP2VIII-4            | 36 <sup>(48)</sup>        | <b>26</b> <sup>(60)</sup> | <b>30</b> <sup>(52)</sup> | 60 <sup>(16)</sup>        | 48 <sup>(36)</sup>        | 58 <sup>(23)</sup>        | possible bradyzoite specific*                                                |
| AP2VIII-5            | <b>16</b> <sup>(66)</sup> | <b>15</b> <sup>(69)</sup> | 32 <sup>(48)</sup>        | 21 <sup>(52)</sup>        | <b>20</b> <sup>(66)</sup> | <b>1</b> <sup>(82)</sup>  | tachyzoites, early bradyzoites & merozoites                                  |
| AP2VIII-6            | <b>8</b> <sup>(75)</sup>  | <b>6</b> <sup>(85)</sup>  | <b>7</b> <sup>(91)</sup>  | 63 <sup>(12)</sup>        | <b>7</b> <sup>(85)</sup>  | <b>14</b> <sup>(61)</sup> | intermediate life cycle & merozoites                                         |
| AP2VIII-7            | <b>4</b> <sup>(88)</sup>  | <b>1</b> <sup>(91)</sup>  | <b>4</b> <sup>(94)</sup>  | 34 <sup>(37)</sup>        | <b>1</b> <sup>(92)</sup>  | <b>15</b> <sup>(61)</sup> | intermediate cycle (P) & merozoites                                          |
| AP2IX-1              | 63 <sup>(10)</sup>        | 60 <sup>(25)</sup>        | 52 <sup>(29)</sup>        | <b>15</b> <sup>(66)</sup> | 54 <sup>(25)</sup>        | <b>6</b> <sup>(74)</sup>  | feline cycle stages* & sporozoites                                           |
| AP2IX-2 <sup>+</sup> | 50 <sup>(32)</sup>        | 42 <sup>(46)</sup>        | N/A                       | N/A                       | 60 <sup>(19)</sup>        | 57 <sup>(23)</sup>        | no clear stage pattern                                                       |
| AP2IX-3              | 44 <sup>(40)</sup>        | 46 <sup>(39)</sup>        | 62 <sup>(12)</sup>        | 19 <sup>(59)</sup>        | 61 <sup>(19)</sup>        | 62 <sup>(20)</sup>        | no clear stage pattern                                                       |
| AP2IX-4              | <b>7</b> <sup>(76)</sup>  | <b>4</b> <sup>(87)</sup>  | <b>3</b> <sup>(95)</sup>  | 38 <sup>(32)</sup>        | <b>26</b> <sup>(59)</sup> | 49 <sup>(29)</sup>        | intermediate life cycle<br><i>dynamic cell cycle</i> (P)                     |
| AP2IX-5              | 28 <sup>(52)</sup>        | 41 <sup>(47)</sup>        | 48 <sup>(31)</sup>        | 43 <sup>(27)</sup>        | 18 <sup>(66)</sup>        | 43 <sup>(36)</sup>        | no clear stage pattern                                                       |
| AP2IX-6              | 43 <sup>(42)</sup>        | 33 <sup>(49)</sup>        | 46 <sup>(32)</sup>        | 40 <sup>(30)</sup>        | 38 <sup>(44)</sup>        | <b>8</b> <sup>(70)</sup>  | feline cycle stages*                                                         |
| AP2IX-7              | 57 <sup>(25)</sup>        | 61 <sup>(23)</sup>        | 56 <sup>(25)</sup>        | 61 <sup>(15)</sup>        | 53 <sup>(28)</sup>        | 53 <sup>(25)</sup>        | no clear stage pattern                                                       |
| AP2IX-8              | <b>17</b> <sup>(66)</sup> | <b>23</b> <sup>(62)</sup> | <b>25</b> <sup>(66)</sup> | 56 <sup>(19)</sup>        | <b>16</b> <sup>(72)</sup> | <b>20</b> <sup>(52)</sup> | intermediate life cycle & possibly merozoites                                |
| AP2IX-9              | 58 <sup>(24)</sup>        | <b>12</b> <sup>(72)</sup> | <b>5</b> <sup>(93)</sup>  | 41 <sup>(29)</sup>        | 50 <sup>(33)</sup>        | 25 <sup>(52)</sup>        | early bradyzoite specific, protein was not detected <i>in vivo</i> cysts (P) |
| AP2X-1               | 47 <sup>(37)</sup>        | 58 <sup>(28)</sup>        | 45 <sup>(34)</sup>        | 59 <sup>(16)</sup>        | 40 <sup>(42)</sup>        | 38 <sup>(39)</sup>        | no clear stage pattern                                                       |

|                     |                    |                    |                    |                    |                    |                    |                                                                     |
|---------------------|--------------------|--------------------|--------------------|--------------------|--------------------|--------------------|---------------------------------------------------------------------|
| AP2X-2 <sup>+</sup> | 30 <sup>(50)</sup> | 27 <sup>(60)</sup> | 49 <sup>(30)</sup> | 7 <sup>(90)</sup>  | 41 <sup>(40)</sup> | 24 <sup>(52)</sup> | sporozoite specific                                                 |
| AP2X-3 <sup>+</sup> | 42 <sup>(42)</sup> | 38 <sup>(47)</sup> | 47 <sup>(31)</sup> | 54 <sup>(20)</sup> | 55 <sup>(24)</sup> | 23 <sup>(52)</sup> | no clear stage pattern                                              |
| AP2X-4              | 13 <sup>(69)</sup> | 21 <sup>(64)</sup> | 28 <sup>(60)</sup> | 57 <sup>(20)</sup> | 17 <sup>(69)</sup> | 11 <sup>(67)</sup> | intermediate cycle & feline cycle stages                            |
| AP2X-5              | 23 <sup>(60)</sup> | 56 <sup>(32)</sup> | 9 <sup>(86)</sup>  | 14 <sup>(66)</sup> | 10 <sup>(80)</sup> | 35 <sup>(41)</sup> | tachyzoites (P), mature bradyzoites & sporozoites                   |
| AP2X-6              | 65 <sup>(4)</sup>  | 66 <sup>(4)</sup>  | 60 <sup>(17)</sup> | 29 <sup>(44)</sup> | 57 <sup>(22)</sup> | 46 <sup>(31)</sup> | no clear stage pattern                                              |
| AP2X-7              | 5 <sup>(86)</sup>  | 7 <sup>(84)</sup>  | 10 <sup>(86)</sup> | 9 <sup>(90)</sup>  | 8 <sup>(85)</sup>  | 19 <sup>(55)</sup> | intermediate life cycle & sporozoites                               |
| AP2X-8              | 46 <sup>(39)</sup> | 55 <sup>(34)</sup> | 44 <sup>(36)</sup> | 36 <sup>(34)</sup> | 51 <sup>(32)</sup> | 60 <sup>(23)</sup> | no clear stage pattern (P)                                          |
| AP2X-9              | 6 <sup>(82)</sup>  | 11 <sup>(73)</sup> | 22 <sup>(68)</sup> | 32 <sup>(39)</sup> | 2 <sup>(91)</sup>  | 12 <sup>(63)</sup> | intermediate life cycle (P) & merozoites*                           |
| AP2X-10             | 59 <sup>(24)</sup> | 47 <sup>(38)</sup> | 54 <sup>(25)</sup> | 1 <sup>(96)</sup>  | 62 <sup>(18)</sup> | 28 <sup>(49)</sup> | sporozoites & feline cycle*                                         |
| AP2X-11             | 45 <sup>(39)</sup> | 51 <sup>(37)</sup> | 42 <sup>(37)</sup> | 47 <sup>(25)</sup> | 34 <sup>(48)</sup> | 39 <sup>(39)</sup> | no clear stage pattern                                              |
| AP2XI-1             | 20 <sup>(63)</sup> | 10 <sup>(74)</sup> | 61 <sup>(16)</sup> | 26 <sup>(48)</sup> | 56 <sup>(24)</sup> | 56 <sup>(24)</sup> | no clear stage pattern<br><i>dynamic cell cycle</i> (P)             |
| AP2XI-2             | 26 <sup>(56)</sup> | 16 <sup>(67)</sup> | 15 <sup>(77)</sup> | 62 <sup>(14)</sup> | 14 <sup>(74)</sup> | 30 <sup>(47)</sup> | intermediate life cycle (P)                                         |
| AP2XI-3             | 29 <sup>(50)</sup> | 45 <sup>(43)</sup> | 26 <sup>(62)</sup> | 51 <sup>(22)</sup> | 12 <sup>(77)</sup> | 4 <sup>(76)</sup>  | no clear stage pattern<br><i>important G1 regulator</i> (P)         |
| AP2XI-4             | 18 <sup>(66)</sup> | 20 <sup>(64)</sup> | 29 <sup>(53)</sup> | 46 <sup>(25)</sup> | 43 <sup>(39)</sup> | 52 <sup>(27)</sup> | likely intermediate cycle specific<br><i>dynamic cell cycle</i> (P) |
| AP2XI-5             | 25 <sup>(57)</sup> | 31 <sup>(53)</sup> | 14 <sup>(79)</sup> | 30 <sup>(43)</sup> | 9 <sup>(81)</sup>  | 3 <sup>(77)</sup>  | no clear stage pattern (P)                                          |
| AP2XII-1            | 31 <sup>(50)</sup> | 39 <sup>(47)</sup> | 6 <sup>(92)</sup>  | 50 <sup>(23)</sup> | 4 <sup>(86)</sup>  | 55 <sup>(23)</sup> | no clear stage pattern                                              |
| AP2XII-2            | 38 <sup>(44)</sup> | 53 <sup>(37)</sup> | 51 <sup>(30)</sup> | 42 <sup>(28)</sup> | 35 <sup>(47)</sup> | 37 <sup>(40)</sup> | no clear stage pattern<br><i>dynamic cell cycle</i>                 |
| AP2XII-3            | 61 <sup>(20)</sup> | 62 <sup>(18)</sup> | 64 <sup>(11)</sup> | 35 <sup>(36)</sup> | 66 <sup>(6)</sup>  | 67 <sup>(4)</sup>  | unsporulated oocyst specific*                                       |
| AP2XII-4            | 15 <sup>(67)</sup> | 34 <sup>(49)</sup> | 23 <sup>(67)</sup> | 25 <sup>(49)</sup> | 33 <sup>(49)</sup> | 31 <sup>(46)</sup> | no clear stage pattern (P)                                          |
| AP2XII-5            | 48 <sup>(35)</sup> | 57 <sup>(30)</sup> | 17 <sup>(76)</sup> | 20 <sup>(53)</sup> | 42 <sup>(39)</sup> | 45 <sup>(33)</sup> | no clear stage pattern (P)                                          |

|                              |                                                                                                                                                                                                                                                                                                                                                                                                                       |                          |                          |                          |                          |                          |                                                         |
|------------------------------|-----------------------------------------------------------------------------------------------------------------------------------------------------------------------------------------------------------------------------------------------------------------------------------------------------------------------------------------------------------------------------------------------------------------------|--------------------------|--------------------------|--------------------------|--------------------------|--------------------------|---------------------------------------------------------|
| <b>AP2XII-6</b>              | <b>32<sup>(50)</sup></b>                                                                                                                                                                                                                                                                                                                                                                                              | <b>19<sup>(64)</sup></b> | <b>59<sup>(17)</sup></b> | <b>55<sup>(20)</sup></b> | <b>30<sup>(51)</sup></b> | <b>9<sup>(69)</sup></b>  | tachyzoites and early bradyzoites & feline cycle        |
| <b>AP2XII-8</b>              | <b>22<sup>(61)</sup></b>                                                                                                                                                                                                                                                                                                                                                                                              | <b>40<sup>(47)</sup></b> | <b>16<sup>(76)</sup></b> | <b>48<sup>(25)</sup></b> | <b>11<sup>(78)</sup></b> | <b>27<sup>(50)</sup></b> | likely intermediate cycle specific*                     |
| <b>AP2XII-9</b>              | <b>49<sup>(33)</sup></b>                                                                                                                                                                                                                                                                                                                                                                                              | <b>59<sup>(26)</sup></b> | <b>37<sup>(41)</sup></b> | <b>53<sup>(20)</sup></b> | <b>24<sup>(62)</sup></b> | <b>50<sup>(29)</sup></b> | no clear stage pattern<br><i>dynamic cell cycle (P)</i> |
|                              | 11                                                                                                                                                                                                                                                                                                                                                                                                                    | 15                       | 21                       | 13                       | 16                       | 8                        | # AP2s ≥ 70% per sample                                 |
|                              | 37                                                                                                                                                                                                                                                                                                                                                                                                                    | 36                       | 36                       | 43                       | 36                       | 41                       | # AP2s ≤ 50% per sample                                 |
| Other data comments          | <ul style="list-style-type: none"> <li># of ApiAP2 factors expressed at &lt;60 percentile in all samples=18 ApiAP2 factors</li> <li>A single ApiAP2 factor is highly expressed in all samples, AP2VI-1</li> </ul>                                                                                                                                                                                                     |                          |                          |                          |                          |                          |                                                         |
| Data sources                 | <ul style="list-style-type: none"> <li>all normalized and percentile values were obtained from ToxoDB</li> <li>+ data for 5 ApiAP2 factors missing from ToxoDB was recovered from original data</li> <li>*Other ToxoDB data used in this analysis; acute vs 28 day CBA/J infected brain tissue (RNA-seq), 29 <i>Toxoplasma</i> strains (RNA-seq), RH synchronized tachyzoite cell cycle mRNAs (microarray)</li> </ul> |                          |                          |                          |                          |                          |                                                         |
| Protein confirmation sources | <ul style="list-style-type: none"> <li>White, Sullivan, Kim, unpublished; AP2Ib-1, AP2III-2, AP2IV-3 (this paper), AP2IV-4, AP2VIIa-5, AP2VIIa-6, AP2VIIb-3, AP2VIII-7, AP2IX-4, AP2XII-4, AP2XII-5</li> <li>reference 6: AP2IX-9, AP2VI-1; reference 10: AP2X-5, AP2X-8, AP2X-9; reference 12: AP2VIIa-1, AP2VIIa-4, AP2VI-1, AP2XI-1, AP2XII-9; reference 26: AP2XI-4</li> </ul>                                    |                          |                          |                          |                          |                          |                                                         |

Hong et al., Figure S1

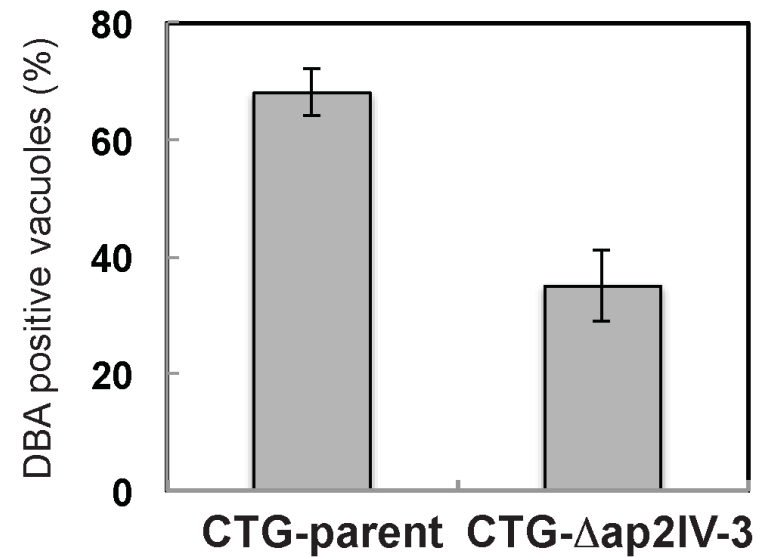

**Figure S1** Disruption of AP2IV-3 by genetic knockout in the Type III CTG strain also shows a decrease in the formation of tissue cysts. IFA quantification in triplicate of tissue cyst numbers (DBA-positive) formed by CTG parent versus CTG- $\Delta ap2IV-3$  clones grown in pH 8.2 media for 72 hrs.

**Dataset S1**

Analysis of 320 published alkaline-stress responsive genes (ref. 25, Behnke et al, 2008) in CTG parent and CTG transgenic strains (CTG- $\Delta ap2IV-3$  and CTG-<sup>DD</sup>AP2IV-3) grown in pH 7.0-pH 8.2 media as indicated. The complete microarray data for this experiment is deposited in GEO (GSE89469).

**Dataset S2**

Expression profiles of 42 mRNAs altered by AP2IV-3 Shield 1-overexpression in ME49 parasites grown in pH 7.0 and pH 8.2 media and M4 strain merozoites and sporozoites.

**Dataset S3**

Transgenic strains produced in this study and key primer sequences.

**Dataset S1 Analysis of 320 stress-induced bradyzoite genes from reference #25 Behnke et al 2008**

| Strains: CTG (WT), CTG- <sup>DD</sup> AP2IV-3 (OE), CTG- $\Delta$ ap2IV-3(KO) |                                             |                               |                               |                                                      |                                                      |                                                |                                              |
|-------------------------------------------------------------------------------|---------------------------------------------|-------------------------------|-------------------------------|------------------------------------------------------|------------------------------------------------------|------------------------------------------------|----------------------------------------------|
|                                                                               | Conditions for microarray: Shield-1 (100nM) |                               |                               |                                                      |                                                      |                                                | Gray highlight are genes plotted in Fig4     |
| Genbank                                                                       | CTG (pH7.0)<br>(RMA Value WT)               | CTG (pH7.8)<br>(RMA Value WT) | CTG (pH8.2)<br>(RMA Value WT) | CTG- <sup>DD</sup> AP2IV-3 (pH7.0)<br>(RMA Value OE) | CTG- <sup>DD</sup> AP2IV-3 (pH7.8)<br>(RMA Value OE) | CTG- $\Delta$ ap2IV-3(pH8.2)<br>(RMA Value KO) | Gene description                             |
| TGME49_200350                                                                 | 407.66                                      | 507.08                        | 164.04                        | 250.19                                               | 242.18                                               | 183.62                                         | subtilase family serine protease             |
| TGME49_201410                                                                 | 1942.56                                     | 1524.49                       | 734.81                        | 1672.66                                              | 1533.83                                              | 515.88                                         | protein phosphatase 2C                       |
| TGME49_201760                                                                 | 651.16                                      | 516.88                        | 160.50                        | 585.72                                               | 499.34                                               | 168.75                                         | hypothetical protein                         |
| TGME49_201840                                                                 | 758.06                                      | 684.13                        | 205.72                        | 618.50                                               | 585.17                                               | 116.63                                         | eukaryotic aspartyl protease                 |
| TGME49_202010                                                                 | 205.67                                      | 215.52                        | 38.05                         | 238.24                                               | 219.06                                               | 37.95                                          | hypothetical protein                         |
| TGME49_202020                                                                 | 312.26                                      | 762.66                        | 496.70                        | 630.88                                               | 663.65                                               | 121.12                                         | DnaK-TPR                                     |
| TGME49_202050                                                                 | 18.74                                       | 21.91                         | 18.28                         | 28.17                                                | 23.84                                                | 21.95                                          | hypothetical protein                         |
| TGME49_202140                                                                 | 262.93                                      | 340.96                        | 77.52                         | 279.45                                               | 294.78                                               | 53.24                                          | enoyl-CoA hydratase/isomerase family protein |
| TGME49_202200                                                                 | 4181.47                                     | 2898.67                       | 1179.20                       | 3033.07                                              | 2796.12                                              | 941.35                                         | hypothetical protein                         |
| TGME49_203230                                                                 | 36.77                                       | 69.68                         | 21.25                         | 37.58                                                | 33.70                                                | 22.18                                          | hypothetical protein                         |
| TGME49_203930                                                                 | 755.91                                      | 440.09                        | 239.00                        | 583.82                                               | 508.44                                               | 197.97                                         | hypothetical protein                         |
| TGME49_204500                                                                 | 29.74                                       | 36.78                         | 19.47                         | 43.88                                                | 41.61                                                | 17.72                                          | hypothetical protein                         |
| TGME49_205250                                                                 | 12.68                                       | 11.60                         | 12.25                         | 14.35                                                | 12.75                                                | 22.19                                          | Rhoptry kinase family protein ROP18          |
| TGME49_205360                                                                 | 295.19                                      | 162.69                        | 68.44                         | 212.43                                               | 223.03                                               | 65.65                                          | hypothetical protein                         |
| TGME49_205490                                                                 | 345.41                                      | 405.67                        | 62.32                         | 356.99                                               | 288.90                                               | 61.55                                          | integral membrane protein                    |
| TGME49_207130                                                                 | 366.64                                      | 324.80                        | 103.78                        | 422.31                                               | 384.85                                               | 93.33                                          | SRS49A (= SAG2Y)                             |
| TGME49_207140                                                                 | 196.99                                      | 112.54                        | 93.63                         | 236.96                                               | 232.69                                               | 41.87                                          | SRS49B (= SAG2X)                             |
| TGME49_207150                                                                 | 654.64                                      | 428.82                        | 176.32                        | 743.26                                               | 692.10                                               | 137.88                                         | SRS49C (= SAG2D)                             |
| TGME49_207160                                                                 | 65.90                                       | 62.72                         | 116.78                        | 81.61                                                | 71.92                                                | 145.78                                         | SRS49D (= SAG2C)                             |
| TGME49_207210                                                                 | 233.81                                      | 81.30                         | 332.68                        | 738.83                                               | 444.70                                               | 73.00                                          | hypothetical protein (UNK)                   |
| TGME49_207590                                                                 | 315.62                                      | 231.04                        | 54.75                         | 236.26                                               | 229.09                                               | 67.02                                          | T-cell activation protein phosphatase 2C     |
| TGME49_207600                                                                 | 57.29                                       | 66.89                         | 34.29                         | 57.81                                                | 61.26                                                | 35.70                                          | tubulin delta chain                          |
| TGME49_208020                                                                 | 19.76                                       | 24.11                         | 13.28                         | 28.69                                                | 20.52                                                | 14.14                                          | hypothetical protein                         |
| TGME49_208320                                                                 | 509.27                                      | 392.93                        | 204.54                        | 420.18                                               | 448.94                                               | 202.67                                         | polynucleotide kinase-3'-phosphatase         |



|               |         |         |         |         |         |         |                                                                 |
|---------------|---------|---------|---------|---------|---------|---------|-----------------------------------------------------------------|
| TGME49_208380 | 12.62   | 13.52   | 12.81   | 15.72   | 16.54   | 11.90   | hypothetical protein                                            |
| TGME49_208430 | 372.02  | 339.84  | 155.07  | 418.65  | 440.22  | 192.02  | serine proteinase inhibitor TgPI-2                              |
| TGME49_208550 | 267.16  | 446.35  | 37.81   | 150.57  | 169.27  | 53.06   | hypothetical protein                                            |
| TGME49_208730 | 141.50  | 154.92  | 109.37  | 219.50  | 207.60  | 71.77   | hypothetical protein                                            |
| TGME49_208740 | 226.48  | 356.23  | 165.78  | 574.02  | 467.48  | 48.69   | microneme protein (MIC UNK)                                     |
| TGME49_209750 | 7.17    | 8.12    | 8.51    | 7.27    | 7.46    | 8.96    | hypothetical protein                                            |
| TGME49_209760 | 12.78   | 10.18   | 19.84   | 21.67   | 19.04   | 12.34   | hypothetical protein                                            |
| TGME49_210370 | 1345.80 | 1071.99 | 363.34  | 1159.84 | 975.89  | 375.67  | RNA helicase-1                                                  |
| TGME49_210420 | 671.29  | 487.25  | 187.30  | 542.90  | 453.72  | 168.53  | hypothetical protein                                            |
| TGME49_211290 | 3905.83 | 3513.55 | 1351.01 | 3340.56 | 3093.07 | 838.26  | hypothetical protein                                            |
| TGME49_212210 | 1024.03 | 1186.84 | 230.22  | 996.88  | 1124.95 | 259.04  | hypothetical protein                                            |
| TGME49_212920 | 539.33  | 683.57  | 241.04  | 680.50  | 678.54  | 223.84  | hypothetical protein                                            |
| TGME49_213450 | 993.01  | 1642.85 | 255.57  | 971.33  | 1153.29 | 341.28  | hypothetical protein                                            |
| TGME49_213460 | 20.86   | 25.22   | 14.82   | 17.90   | 17.30   | 12.25   | hypothetical protein                                            |
| TGME49_213470 | 582.03  | 869.70  | 197.15  | 568.88  | 635.41  | 141.01  | hypothetical protein                                            |
| TGME49_213480 | 86.83   | 88.52   | 30.84   | 87.50   | 92.06   | 20.78   | hypothetical protein                                            |
| TGME49_213880 | 27.63   | 33.33   | 16.74   | 29.27   | 28.13   | 16.87   | hypothetical protein                                            |
| TGME49_214400 | 150.80  | 117.77  | 39.16   | 146.07  | 162.65  | 54.11   | hypothetical protein                                            |
| TGME49_215770 | 177.27  | 183.70  | 88.23   | 406.88  | 376.16  | 49.51   | Rhoptry kinase family protein ROP8 (incomplete catalytic triad) |
| TGME49_215910 | 389.57  | 507.41  | 203.62  | 403.70  | 341.77  | 166.75  | hypothetical protein                                            |
| TGME49_216140 | 1742.38 | 2005.07 | 95.75   | 16.20   | 19.39   | 94.80   | ankyrin repeat-containing protein                               |
| TGME49_216460 | 556.25  | 389.31  | 143.34  | 472.26  | 444.74  | 108.51  | hypothetical protein                                            |
| TGME49_216490 | 253.29  | 310.58  | 158.61  | 288.60  | 272.06  | 103.98  | hypothetical protein                                            |
| TGME49_216620 | 470.80  | 293.46  | 77.09   | 302.12  | 322.07  | 66.61   | EF hand domain-containing protein                               |
| TGME49_217410 | 246.63  | 251.54  | 114.39  | 294.10  | 288.15  | 63.81   | hypothetical protein                                            |
| TGME49_218270 | 1447.52 | 771.86  | 423.58  | 1098.65 | 938.89  | 487.04  | hypothetical protein                                            |
| TGME49_218520 | 5577.59 | 8411.51 | 2542.35 | 5994.98 | 6173.55 | 2558.61 | microneme protein MIC6                                          |
| TGME49_218740 | 996.61  | 1785.38 | 489.12  | 1132.85 | 1275.41 | 607.93  | hypothetical protein                                            |
| TGME49_220560 | 51.85   | 64.17   | 25.19   | 53.46   | 59.85   | 26.27   | hypothetical protein                                            |
| TGME49_221250 | 20.28   | 17.70   | 12.16   | 16.64   | 15.72   | 15.67   | hypothetical protein                                            |
| TGME49_221310 | 196.20  | 136.42  | 43.53   | 154.74  | 148.41  | 46.59   | aminopeptidase N                                                |
| TGME49_221540 | 330.24  | 277.63  | 62.45   | 263.31  | 207.36  | 60.35   | hypothetical protein                                            |
| TGME49_221840 | 334.69  | 402.38  | 143.73  | 445.43  | 420.88  | 72.36   | hypothetical protein                                            |
| TGME49_222100 | 1186.22 | 847.25  | 274.51  | 904.87  | 862.61  | 236.36  | hypothetical protein                                            |

|               |          |          |         |          |          |         |                                                                     |
|---------------|----------|----------|---------|----------|----------|---------|---------------------------------------------------------------------|
| TGME49_222370 | 51.43    | 36.32    | 27.57   | 84.74    | 97.08    | 34.02   | SRS13                                                               |
| TGME49_223060 | 362.53   | 418.19   | 172.24  | 382.39   | 364.87   | 69.47   | MORN repeat-containing protein                                      |
| TGME49_223550 | 83.32    | 172.41   | 77.45   | 184.07   | 181.59   | 46.37   | hypothetical protein                                                |
| TGME49_223850 | 226.42   | 277.40   | 72.99   | 326.18   | 275.76   | 52.03   | hypothetical protein                                                |
| TGME49_223920 | 2555.18  | 1585.89  | 874.54  | 1963.37  | 1701.44  | 621.62  | hypothetical protein                                                |
| TGME49_224170 | 93.33    | 103.61   | 57.05   | 101.48   | 104.62   | 46.11   | SRS domain-containing protein                                       |
| TGME49_224180 | 99.04    | 125.81   | 38.18   | 90.99    | 93.52    | 45.93   | ankyrin repeat-containing protein                                   |
| TGME49_224570 | 485.16   | 269.72   | 81.86   | 353.05   | 346.16   | 80.98   | hypothetical protein                                                |
| TGME49_224710 | 237.16   | 155.20   | 114.98  | 278.96   | 264.03   | 93.78   | vacuolar sorting receptor protein                                   |
| TGME49_224760 | 532.54   | 1091.80  | 163.94  | 453.90   | 459.18   | 76.75   | SRS40E (= SRS4)                                                     |
| TGME49_225150 | 1402.05  | 962.96   | 273.14  | 1126.16  | 1048.57  | 266.91  | hypothetical protein                                                |
| TGME49_225290 | 428.63   | 294.28   | 128.82  | 310.32   | 320.21   | 65.60   | nucleoside-triphosphatase                                           |
| TGME49_225320 | 859.95   | 557.09   | 220.14  | 725.72   | 747.09   | 187.81  | hypothetical protein                                                |
| TGME49_225330 | 482.13   | 313.75   | 91.12   | 346.38   | 327.11   | 79.16   | hypothetical protein                                                |
| TGME49_225540 | 489.77   | 979.93   | 214.17  | 695.53   | 731.54   | 181.67  | hypothetical protein                                                |
| TGME49_225860 | 379.04   | 261.72   | 82.87   | 318.17   | 301.29   | 113.24  | hypothetical protein                                                |
| TGME49_226420 | 777.06   | 721.12   | 314.49  | 854.12   | 851.21   | 216.96  | oligoendopeptidase F                                                |
| TGME49_226690 | 222.96   | 166.86   | 66.51   | 182.32   | 174.23   | 76.67   | hypothetical protein                                                |
| TGME49_226710 | 1312.17  | 795.42   | 309.08  | 1025.46  | 872.00   | 215.15  | hypothetical protein                                                |
| TGME49_226770 | 223.17   | 137.65   | 28.55   | 150.00   | 123.26   | 35.67   | cGMP-inhibited 3'                                                   |
| TGME49_227000 | 465.05   | 336.71   | 89.59   | 375.03   | 358.54   | 65.36   | hypothetical protein                                                |
| TGME49_227430 | 23.65    | 29.99    | 57.71   | 151.48   | 148.58   | 32.88   | hypothetical protein                                                |
| TGME49_227810 | 8472.18  | 5192.10  | 2798.61 | 6820.34  | 6123.81  | 1616.17 | Rhoptry kinase family protein ROP11<br>(incomplete catalytic triad) |
| TGME49_228160 | 15.05    | 13.05    | 20.14   | 14.66    | 12.95    | 38.46   | serine/threonine protein<br>phosphatase                             |
| TGME49_229010 | 740.39   | 534.57   | 127.95  | 592.74   | 509.99   | 99.87   | hypothetical protein                                                |
| TGME49_229500 | 178.06   | 122.69   | 74.06   | 147.97   | 129.07   | 103.90  | hypothetical protein                                                |
| TGME49_229680 | 83.82    | 86.34    | 44.48   | 87.47    | 76.20    | 47.57   | hypothetical protein                                                |
| TGME49_229720 | 40.24    | 43.83    | 33.93   | 35.97    | 35.15    | 43.92   | hypothetical protein                                                |
| TGME49_230130 | 35.96    | 31.89    | 27.98   | 35.79    | 29.50    | 20.98   | hypothetical protein                                                |
| TGME49_230160 | 12618.33 | 15396.28 | 5903.58 | 11707.51 | 12050.84 | 5699.61 | hypothetical protein                                                |
| TGME49_230350 | 847.20   | 552.33   | 254.46  | 642.69   | 574.93   | 230.40  | hypothetical protein                                                |
| TGME49_230360 | 60.78    | 42.83    | 26.30   | 47.12    | 42.39    | 37.99   | hypothetical protein                                                |
| TGME49_230370 | 15.34    | 15.12    | 10.80   | 14.32    | 14.61    | 10.64   | hypothetical protein                                                |

|               |         |         |         |         |         |         |                                                     |
|---------------|---------|---------|---------|---------|---------|---------|-----------------------------------------------------|
| TGME49_230470 | 1438.40 | 1322.47 | 626.25  | 1385.48 | 1154.74 | 227.02  | Rhoptry kinase family protein ROP46                 |
| TGME49_230980 | 130.71  | 104.72  | 54.77   | 132.62  | 94.93   | 58.88   | myosin head motor domain-containing protein TgMyo I |
| TGME49_231840 | 350.79  | 261.79  | 120.34  | 256.10  | 256.48  | 111.53  | tola protein.                                       |
| TGME49_231880 | 13.95   | 12.07   | 18.05   | 14.07   | 12.45   | 17.68   | glutamine/glutamic acid rich protein                |
| TGME49_232020 | 143.54  | 111.32  | 33.71   | 120.97  | 126.51  | 45.35   | hypothetical protein                                |
| TGME49_232350 | 6387.91 | 7498.43 | 2059.96 | 5975.51 | 6009.48 | 1336.90 | lactate dehydrogenase                               |
| TGME49_232590 | 272.54  | 288.84  | 119.46  | 252.22  | 248.60  | 94.16   | gamma-glutamylcysteine synthetase                   |
| TGME49_233030 | 906.84  | 773.83  | 161.02  | 788.20  | 668.12  | 159.63  | myosin-A docking protein                            |
| TGME49_233450 | 3910.18 | 5294.72 | 1285.04 | 3618.72 | 3501.13 | 741.08  | SRS29A (= SRS1)                                     |
| TGME49_234540 | 622.62  | 427.09  | 146.97  | 540.05  | 505.52  | 121.56  | hypothetical protein                                |
| TGME49_235500 | 507.46  | 844.90  | 197.75  | 538.31  | 576.75  | 94.80   | hypothetical protein                                |
| TGME49_235860 | 246.15  | 155.60  | 88.73   | 183.20  | 165.84  | 35.79   | subtilisin-like protease                            |
| TGME49_236010 | 1239.23 | 1431.79 | 505.88  | 1127.61 | 1121.95 | 384.49  | prenylcysteine oxidase                              |
| TGME49_236070 | 1343.85 | 1782.84 | 586.62  | 1755.30 | 1703.00 | 438.86  | pyrroline-5-carboxylate reductase                   |
| TGME49_237090 | 16.44   | 19.67   | 16.36   | 18.37   | 18.10   | 19.13   | hypothetical protein                                |
| TGME49_237180 | 1365.29 | 1215.41 | 478.31  | 1162.17 | 1025.98 | 383.86  | hypothetical protein                                |
| TGME49_237190 | 88.02   | 57.49   | 25.74   | 89.33   | 75.09   | 36.70   | hypothetical protein                                |
| TGME49_237820 | 106.89  | 83.06   | 34.62   | 125.57  | 87.34   | 29.91   | hypothetical protein                                |
| TGME49_238200 | 525.82  | 445.60  | 296.56  | 462.18  | 461.19  | 320.22  | alpha/beta hydrolase fold domain containing protein |
| TGME49_238210 | 146.28  | 255.00  | 82.80   | 299.30  | 218.25  | 76.75   | microneme protein                                   |
| TGME49_238440 | 17.66   | 18.44   | 27.15   | 67.63   | 41.29   | 19.47   | SRS22A                                              |
| TGME49_239020 | 339.75  | 351.72  | 97.30   | 367.23  | 342.55  | 91.59   | ATP-binding cassette protein subfamily B member 2   |
| TGME49_240090 | 159.75  | 277.72  | 45.01   | 197.78  | 177.55  | 41.02   | Rhoptry kinase family protein ROP34                 |
| TGME49_240470 | 57.83   | 90.77   | 61.54   | 120.14  | 148.89  | 32.50   | hypothetical protein                                |
| TGME49_240930 | 67.58   | 63.83   | 47.09   | 99.17   | 90.38   | 44.91   | molybdenum cofactor biosynthesis protein c          |
| TGME49_240950 | 321.22  | 204.94  | 139.40  | 231.23  | 243.95  | 189.20  | hypothetical protein                                |
| TGME49_241150 | 816.27  | 592.91  | 372.54  | 620.82  | 672.14  | 325.15  | hypothetical protein                                |
| TGME49_242230 | 3389.20 | 2231.08 | 1201.88 | 2239.11 | 2394.41 | 481.09  | Rhoptry kinase family protein ROP29                 |
| TGME49_243200 | 1029.96 | 515.13  | 112.40  | 647.92  | 628.30  | 139.15  | hypothetical protein                                |
| TGME49_243470 | 205.93  | 306.91  | 108.55  | 62.92   | 65.51   | 71.99   | hypothetical protein                                |
| TGME49_243690 | 4008.01 | 2827.73 | 1220.95 | 3094.05 | 2774.72 | 769.72  | hypothetical protein                                |

|               |         |         |         |         |         |         |                                                                  |
|---------------|---------|---------|---------|---------|---------|---------|------------------------------------------------------------------|
| TGME49_243720 | 34.86   | 38.61   | 23.66   | 44.70   | 45.17   | 20.67   | peroxisomal biogenesis factor 11 domain-containing protein       |
| TGME49_243940 | 289.53  | 291.66  | 109.62  | 299.73  | 313.72  | 85.44   | hypothetical protein                                             |
| TGME49_244330 | 28.80   | 33.36   | 28.81   | 42.93   | 53.00   | 33.31   | hypothetical protein                                             |
| TGME49_244500 | 881.43  | 490.35  | 119.07  | 678.42  | 666.75  | 123.79  | tubulin-tyrosine ligase family protein                           |
| TGME49_246070 | 32.47   | 29.22   | 22.67   | 45.61   | 39.77   | 23.14   | SRS56A                                                           |
| TGME49_247400 | 1209.66 | 2381.92 | 741.89  | 1759.60 | 1722.29 | 511.71  | hypothetical protein                                             |
| TGME49_247530 | 3962.98 | 5697.82 | 1720.34 | 4806.37 | 4619.73 | 1053.26 | hypothetical protein                                             |
| TGME49_247740 | 133.18  | 152.99  | 69.72   | 147.06  | 164.92  | 45.88   | RNA methyltransferase                                            |
| TGME49_249150 | 191.45  | 288.75  | 40.57   | 105.42  | 85.42   | 39.82   | PAN domain-containing protein                                    |
| TGME49_249300 | 916.35  | 1154.03 | 284.57  | 904.75  | 970.60  | 261.49  | hypothetical protein                                             |
| TGME49_249540 | 46.89   | 72.62   | 24.11   | 69.92   | 53.61   | 24.27   | hypothetical protein                                             |
| TGME49_249570 | 2512.36 | 1305.76 | 649.04  | 2508.05 | 1482.50 | 612.83  | hypothetical protein                                             |
| TGME49_249770 | 142.26  | 147.32  | 51.77   | 154.29  | 145.64  | 73.29   | hypothetical protein                                             |
| TGME49_250120 | 212.10  | 517.18  | 100.37  | 237.20  | 218.54  | 159.73  | hypothetical protein                                             |
| TGME49_250360 | 168.12  | 346.21  | 147.39  | 234.18  | 215.07  | 159.43  | esterase                                                         |
| TGME49_250760 | 21.45   | 24.04   | 14.16   | 22.44   | 22.11   | 18.00   | PPR repeat-containing protein                                    |
| TGME49_251490 | 195.84  | 201.76  | 43.03   | 207.57  | 196.64  | 53.40   | hypothetical protein                                             |
| TGME49_251540 | 1769.40 | 2058.79 | 632.25  | 1603.40 | 1528.34 | 369.63  | GRA9 protein                                                     |
| TGME49_252200 | 279.22  | 199.78  | 71.84   | 284.28  | 239.32  | 61.00   | zinc finger DHHC domain-containing protein                       |
| TGME49_252360 | 1863.29 | 1321.29 | 356.82  | 1438.22 | 1304.34 | 419.97  | Rhoptry kinase family protein ROP24 (incomplete catalytic triad) |
| TGME49_252640 | 29.62   | 34.92   | 32.60   | 73.63   | 60.03   | 21.63   | TgPMA1                                                           |
| TGME49_253330 | 1018.14 | 591.42  | 263.88  | 707.78  | 569.07  | 56.50   | Rhoptry kinase family protein                                    |
| TGME49_253340 | 14.89   | 19.82   | 14.68   | 15.85   | 15.28   | 10.97   | hypothetical protein                                             |
| TGME49_254040 | 193.15  | 130.84  | 130.08  | 146.00  | 146.97  | 128.81  | hypothetical protein                                             |
| TGME49_254060 | 20.02   | 22.67   | 24.21   | 29.19   | 40.49   | 22.18   | SRS14                                                            |
| TGME49_254470 | 1125.64 | 1765.30 | 497.95  | 1176.97 | 1317.98 | 355.54  | hypothetical protein                                             |
| TGME49_254660 | 1371.62 | 1306.21 | 312.56  | 1310.11 | 1436.95 | 326.56  | ankyrin repeat-containing protein                                |
| TGME49_254670 | 1108.18 | 1034.84 | 255.51  | 1139.76 | 1152.03 | 271.49  | hypothetical protein                                             |
| TGME49_254880 | 1472.31 | 881.74  | 426.30  | 1156.03 | 1141.52 | 327.18  | alpha-galactosidase A                                            |
| TGME49_254890 | 59.95   | 47.41   | 38.15   | 115.46  | 138.47  | 38.42   | hypothetical protein                                             |
| TGME49_256030 | 935.66  | 695.87  | 280.41  | 835.89  | 747.95  | 283.96  | hypothetical protein                                             |
| TGME49_257550 | 544.12  | 341.11  | 91.90   | 453.01  | 446.75  | 83.18   | hypothetical protein                                             |
| TGME49_257570 | 25.93   | 25.13   | 21.45   | 30.42   | 26.67   | 24.46   | hypothetical protein                                             |

|               |          |          |         |          |          |         |                                                                              |
|---------------|----------|----------|---------|----------|----------|---------|------------------------------------------------------------------------------|
| TGME49_257760 | 267.77   | 349.36   | 61.02   | 282.97   | 284.51   | 36.03   | hypothetical protein                                                         |
| TGME49_258360 | 1684.18  | 1163.38  | 386.39  | 1578.67  | 1352.57  | 307.68  | hypothetical protein                                                         |
| TGME49_258560 | 101.71   | 104.63   | 34.97   | 93.37    | 103.35   | 29.47   | hypothetical protein                                                         |
| TGME49_258590 | 117.04   | 89.10    | 20.14   | 90.11    | 98.16    | 22.83   | hypothetical protein                                                         |
| TGME49_258660 | 6523.33  | 4838.44  | 2088.77 | 5712.02  | 5348.17  | 1442.98 | rhoptry protein 6                                                            |
| TGME49_258700 | 300.86   | 229.61   | 98.71   | 249.95   | 232.63   | 109.40  | hypothetical protein                                                         |
| TGME49_258800 | 45.37    | 31.31    | 23.08   | 46.24    | 39.14    | 23.24   | Rhoptry kinase family protein ROP31                                          |
| TGME49_259020 | 58.81    | 58.84    | 184.78  | 737.09   | 512.01   | 40.73   | bradyzoite antigen (BAG1)                                                    |
| TGME49_259700 | 1404.22  | 1290.87  | 407.54  | 1219.48  | 1138.32  | 303.58  | hypothetical protein                                                         |
| TGME49_260190 | 151.27   | 153.10   | 41.91   | 163.25   | 190.00   | 22.33   | microneme protein                                                            |
| TGME49_260440 | 2250.45  | 3104.06  | 1514.99 | 2806.44  | 3197.75  | 1019.77 | 46 kDa FK506-binding nuclear protein                                         |
| TGME49_260580 | 248.85   | 150.99   | 50.95   | 233.12   | 191.83   | 44.65   | hypothetical protein                                                         |
| TGME49_261650 | 261.85   | 261.48   | 152.40  | 315.51   | 304.80   | 103.74  | hypothetical protein                                                         |
| TGME49_261740 | 18627.26 | 16857.48 | 7472.67 | 17332.77 | 16313.97 | 7670.01 | hypothetical protein                                                         |
| TGME49_262050 | 5704.09  | 4572.61  | 2122.73 | 4938.21  | 4513.41  | 840.92  | Rhoptry kinase family protein ROP39                                          |
| TGME49_262730 | 807.37   | 654.50   | 241.30  | 761.71   | 703.55   | 190.91  | Rhoptry kinase family protein ROP16                                          |
| TGME49_262950 | 107.04   | 72.96    | 41.70   | 95.64    | 91.79    | 43.34   | enterophilin-2L                                                              |
| TGME49_262970 | 124.35   | 137.11   | 32.85   | 181.29   | 143.58   | 36.43   | zinc finger (CCCH type) protein                                              |
| TGME49_263270 | 473.78   | 461.81   | 209.91  | 492.73   | 463.43   | 168.28  | glycerophosphoryl diester phosphodiesterase family domain containing protein |
| TGME49_264150 | 24.16    | 28.52    | 15.72   | 49.19    | 40.97    | 17.21   | hypothetical protein                                                         |
| TGME49_264590 | 44.95    | 70.86    | 26.61   | 55.33    | 51.91    | 22.36   | hypothetical protein                                                         |
| TGME49_264600 | 2198.33  | 1454.31  | 647.23  | 2040.44  | 1829.65  | 480.22  | hypothetical protein                                                         |
| TGME49_264630 | 23.29    | 21.60    | 23.44   | 58.08    | 41.59    | 29.00   | hypothetical protein                                                         |
| TGME49_265070 | 312.38   | 192.56   | 73.25   | 250.72   | 237.07   | 72.57   | hypothetical protein                                                         |
| TGME49_265420 | 600.67   | 482.17   | 133.33  | 561.29   | 491.33   | 117.79  | hypothetical protein                                                         |
| TGME49_265650 | 368.79   | 229.22   | 80.47   | 251.26   | 246.74   | 75.82   | hypothetical protein                                                         |
| TGME49_266270 | 28.51    | 30.91    | 19.70   | 35.82    | 36.21    | 14.14   | 2-methylbutyryl-CoA dehydrogenase                                            |
| TGME49_266320 | 506.30   | 297.49   | 146.28  | 364.44   | 376.86   | 131.73  | hypothetical protein                                                         |
| TGME49_266680 | 362.97   | 429.44   | 160.55  | 390.55   | 421.01   | 134.23  | hypothetical protein                                                         |
| TGME49_266970 | 1181.58  | 1203.08  | 386.91  | 1186.58  | 1193.60  | 330.42  | hypothetical protein                                                         |
| TGME49_267130 | 73.74    | 127.56   | 72.50   | 121.70   | 124.79   | 50.58   | SRS38A                                                                       |
| TGME49_267460 | 15.71    | 15.35    | 12.74   | 14.39    | 14.15    | 9.61    | hypothetical protein                                                         |
| TGME49_267470 | 74.98    | 117.83   | 38.98   | 138.74   | 139.91   | 63.65   | hypothetical protein                                                         |

|               |         |         |         |         |         |        |                                             |
|---------------|---------|---------|---------|---------|---------|--------|---------------------------------------------|
| TGME49_267670 | 75.43   | 100.21  | 47.49   | 148.01  | 138.36  | 51.62  | hypothetical protein                        |
| TGME49_267980 | 10.15   | 11.09   | 11.26   | 10.71   | 11.46   | 10.71  | hypothetical protein                        |
| TGME49_268360 | 139.89  | 106.63  | 79.35   | 236.21  | 233.29  | 25.65  | hypothetical protein                        |
| TGME49_268760 | 1930.45 | 1952.45 | 601.91  | 1701.81 | 1580.90 | 442.33 | hypothetical protein                        |
| TGME49_268860 | 12.17   | 12.60   | 17.21   | 34.54   | 28.35   | 11.29  | enolase 1                                   |
| TGME49_269300 | 18.01   | 15.20   | 13.48   | 15.96   | 15.14   | 10.14  | lipase domain-containing protein            |
| TGME49_269310 | 13.37   | 13.87   | 13.89   | 13.39   | 11.97   | 14.25  | D13                                         |
| TGME49_269340 | 2312.74 | 1521.53 | 614.18  | 1651.42 | 1572.95 | 416.30 | hypothetical protein                        |
| TGME49_269600 | 1000.58 | 908.22  | 360.65  | 917.35  | 1001.55 | 126.42 | biotin carboxyl carrier protein             |
| TGME49_269610 | 123.36  | 121.14  | 28.51   | 130.09  | 143.55  | 30.17  | hypothetical protein                        |
| TGME49_269870 | 2392.80 | 1414.12 | 635.44  | 1616.61 | 1501.67 | 468.74 | hypothetical protein                        |
| TGME49_270160 | 192.98  | 167.41  | 54.15   | 174.20  | 166.74  | 41.10  | hypothetical protein                        |
| TGME49_270260 | 21.93   | 44.30   | 19.75   | 37.28   | 35.12   | 18.99  | hypothetical protein                        |
| TGME49_270700 | 272.93  | 633.46  | 101.29  | 422.63  | 514.15  | 117.34 | hypothetical protein                        |
| TGME49_271070 | 51.09   | 40.48   | 21.31   | 46.43   | 55.80   | 22.03  | cysteine protease domain containing protein |
| TGME49_271270 | 1409.43 | 1125.74 | 698.26  | 1221.76 | 1068.29 | 576.53 | hypothetical protein                        |
| TGME49_271320 | 208.03  | 172.99  | 58.21   | 216.53  | 202.50  | 66.62  | hypothetical protein                        |
| TGME49_271770 | 74.31   | 68.64   | 29.78   | 65.30   | 67.48   | 25.58  | hypothetical protein                        |
| TGME49_272440 | 68.61   | 48.17   | 23.52   | 46.27   | 44.49   | 22.67  | hypothetical protein                        |
| TGME49_273130 | 1094.69 | 799.25  | 488.72  | 873.29  | 848.75  | 392.54 | SRS30A                                      |
| TGME49_273980 | 320.41  | 352.18  | 219.70  | 960.00  | 837.27  | 107.94 | hypothetical protein                        |
| TGME49_274140 | 69.27   | 93.75   | 26.07   | 67.07   | 79.36   | 28.82  | RNA recognition motif-containing protein    |
| TGME49_274170 | 60.64   | 82.58   | 56.56   | 137.45  | 107.94  | 40.71  | protein kinase (incomplete catalytic triad) |
| TGME49_275980 | 225.24  | 241.07  | 66.06   | 179.12  | 197.59  | 47.11  | ubiquinone biosynthesis protein COQ4        |
| TGME49_276130 | 402.61  | 360.47  | 102.90  | 360.32  | 309.48  | 125.56 | cathepsin C2 (TgCPC2)                       |
| TGME49_276930 | 2427.98 | 3077.19 | 1088.33 | 2839.60 | 3128.62 | 606.98 | hypothetical protein                        |
| TGME49_277730 | 38.83   | 48.65   | 49.97   | 55.51   | 44.77   | 52.02  | hypothetical protein                        |
| TGME49_278080 | 253.90  | 315.96  | 249.17  | 385.85  | 403.18  | 129.23 | hypothetical protein                        |
| TGME49_278370 | 27.62   | 26.98   | 17.33   | 31.38   | 32.38   | 33.89  | hypothetical protein                        |
| TGME49_278390 | 15.19   | 11.80   | 24.03   | 16.98   | 20.33   | 48.95  | hypothetical protein                        |
| TGME49_278980 | 24.89   | 27.26   | 18.04   | 39.29   | 36.51   | 16.30  | hypothetical protein                        |
| TGME49_280480 | 567.87  | 395.55  | 149.50  | 464.72  | 493.30  | 151.14 | calmodulin                                  |

|               |         |         |         |         |         |         |                                                                     |
|---------------|---------|---------|---------|---------|---------|---------|---------------------------------------------------------------------|
| TGME49_280570 | 4292.89 | 3524.08 | 3175.13 | 5796.80 | 5319.56 | 679.60  | bradyzoite surface antigen                                          |
| TGME49_280580 | 4454.94 | 2986.60 | 1075.82 | 3099.33 | 3278.92 | 273.70  | p18 surface antigen                                                 |
| TGME49_280670 | 1065.76 | 715.63  | 419.23  | 910.75  | 773.93  | 241.30  | hypothetical protein                                                |
| TGME49_281790 | 122.81  | 129.20  | 37.13   | 151.84  | 101.36  | 59.43   | Rhoptry kinase family protein ROP45<br>(incomplete catalytic triad) |
| TGME49_284310 | 18.71   | 17.86   | 11.59   | 22.07   | 19.36   | 14.95   | hypothetical protein                                                |
| TGME49_284420 | 41.59   | 47.39   | 14.08   | 49.18   | 48.13   | 13.56   | hypothetical protein                                                |
| TGME49_285290 | 752.36  | 495.13  | 171.20  | 556.39  | 550.19  | 147.26  | hypothetical protein                                                |
| TGME49_285650 | 64.20   | 48.57   | 39.26   | 53.82   | 54.47   | 61.86   | hypothetical protein                                                |
| TGME49_285860 | 175.38  | 91.87   | 39.38   | 262.52  | 298.97  | 103.46  | SRS20C                                                              |
| TGME49_285870 | 5719.36 | 4336.39 | 1620.79 | 6194.42 | 6130.06 | 946.50  | SRS20A                                                              |
| TGME49_286000 | 60.63   | 131.89  | 40.30   | 132.16  | 141.28  | 34.76   | hypothetical protein                                                |
| TGME49_286150 | 25.72   | 28.72   | 23.88   | 32.76   | 37.36   | 13.57   | PAN domain-containing protein                                       |
| TGME49_286500 | 691.04  | 322.69  | 191.76  | 454.61  | 430.92  | 149.36  | hypothetical protein                                                |
| TGME49_286580 | 1237.05 | 1103.71 | 403.48  | 1206.86 | 994.48  | 467.06  | lysophospholipase                                                   |
| TGME49_286670 | 260.93  | 274.62  | 77.10   | 229.36  | 260.76  | 61.01   | hypothetical protein                                                |
| TGME49_286740 | 108.61  | 163.23  | 29.94   | 130.72  | 112.17  | 27.84   | microneme protein                                                   |
| TGME49_287970 | 583.14  | 341.70  | 153.85  | 413.14  | 384.85  | 198.68  | hypothetical protein                                                |
| TGME49_288000 | 256.72  | 328.16  | 63.82   | 258.57  | 259.45  | 58.76   | hypothetical protein                                                |
| TGME49_288690 | 85.95   | 127.40  | 29.17   | 134.09  | 99.47   | 26.52   | DnaJ domain-containing protein                                      |
| TGME49_289620 | 2088.23 | 3341.61 | 903.87  | 2345.14 | 2531.27 | 718.73  | cathepsin C                                                         |
| TGME49_290970 | 475.31  | 227.55  | 267.78  | 811.61  | 563.46  | 93.34   | serine palmitoyltransferase                                         |
| TGME49_290980 | 312.92  | 322.76  | 64.56   | 235.64  | 250.70  | 80.90   | aminotransferase domain-containing<br>protein                       |
| TGME49_291040 | 29.88   | 17.60   | 34.37   | 117.68  | 68.28   | 18.21   | lactate dehydrogenase (LDH2)                                        |
| TGME49_291910 | 12.69   | 15.94   | 9.76    | 17.85   | 15.77   | 10.53   | hypothetical protein                                                |
| TGME49_291960 | 6411.67 | 4380.21 | 1864.22 | 5333.37 | 4821.65 | 1423.17 | Rhoptry kinase family protein ROP40<br>(incomplete catalytic triad) |
| TGME49_293280 | 16.24   | 19.39   | 27.49   | 21.13   | 18.07   | 22.95   | hypothetical protein                                                |
| TGME49_293430 | 4002.27 | 3083.82 | 1144.27 | 3020.92 | 2660.13 | 984.49  | hypothetical protein                                                |
| TGME49_293540 | 551.81  | 407.90  | 127.80  | 478.03  | 388.88  | 107.88  | hypothetical protein                                                |
| TGME49_293780 | 820.92  | 656.91  | 232.06  | 594.33  | 505.99  | 89.23   | hypothetical protein                                                |
| TGME49_293790 | 61.54   | 50.06   | 37.70   | 82.85   | 62.84   | 28.15   | hypothetical protein                                                |
| TGME49_293810 | 96.59   | 120.30  | 34.17   | 87.15   | 80.87   | 31.55   | 2-methylisocitrate lyase                                            |
| TGME49_294410 | 21.76   | 28.70   | 19.59   | 23.99   | 19.26   | 21.34   | hypothetical protein                                                |

|               |         |         |         |         |         |         |                                          |
|---------------|---------|---------|---------|---------|---------|---------|------------------------------------------|
| TGME49_294570 | 45.85   | 43.33   | 42.82   | 49.39   | 43.23   | 27.94   | rhodanese-like domain containing protein |
| TGME49_294610 | 568.12  | 407.10  | 144.27  | 474.13  | 379.94  | 190.26  | hypothetical protein                     |
| TGME49_294790 | 4783.75 | 4342.67 | 2273.79 | 5131.58 | 4643.21 | 1738.86 | hypothetical protein                     |
| TGME49_295390 | 11.97   | 9.96    | 11.84   | 11.62   | 11.47   | 13.11   | hypothetical protein                     |
| TGME49_295950 | 10.33   | 10.33   | 11.10   | 9.84    | 10.27   | 10.91   | hypothetical protein                     |
| TGME49_295960 | 22.70   | 30.69   | 21.38   | 19.51   | 18.28   | 40.42   | hypothetical protein                     |
| TGME49_297070 | 2350.88 | 1572.03 | 379.39  | 1706.85 | 1595.73 | 322.84  | duplicated carbonic anhydrase            |
| TGME49_297120 | 1166.86 | 693.59  | 304.83  | 855.71  | 913.12  | 238.49  | hypothetical protein                     |
| TGME49_297860 | 488.85  | 319.07  | 155.38  | 440.47  | 403.16  | 150.37  | hypothetical protein                     |
| TGME49_297960 | 1168.64 | 804.09  | 252.76  | 967.18  | 829.10  | 276.06  | hypothetical protein                     |
| TGME49_299060 | 600.21  | 400.78  | 207.71  | 500.85  | 444.84  | 169.24  | sodium/hydrogen exchanger                |
| TGME49_300100 | 274.39  | 234.40  | 46.37   | 229.40  | 184.44  | 43.33   | rhoptry neck protein 2                   |
| TGME49_300130 | 33.12   | 37.19   | 21.12   | 62.51   | 60.82   | 39.76   | apical membrane antigen                  |
| TGME49_300290 | 131.23  | 105.06  | 50.74   | 96.72   | 113.03  | 82.73   | SNARE domain-containing protein          |
| TGME49_301160 | 532.76  | 416.96  | 194.55  | 631.68  | 661.31  | 83.17   | SRS19C (= SRS7)                          |
| TGME49_301240 | 12.59   | 12.62   | 10.66   | 15.82   | 13.18   | 12.41   | hypothetical protein                     |
| TGME49_301350 | 30.92   | 20.05   | 35.51   | 35.56   | 26.70   | 19.22   | hypothetical protein                     |
| TGME49_301420 | 2050.74 | 1200.05 | 624.00  | 1634.16 | 1334.03 | 516.49  | hypothetical protein                     |
| TGME49_304670 | 330.49  | 241.61  | 70.16   | 307.41  | 251.17  | 59.74   | internalin                               |
| TGME49_304930 | 548.61  | 539.87  | 187.26  | 582.84  | 573.39  | 120.90  | hypothetical protein                     |
| TGME49_304940 | 1504.86 | 1401.26 | 825.05  | 1495.75 | 1539.22 | 250.22  | hypothetical protein                     |
| TGME49_305050 | 4173.08 | 4122.19 | 1133.81 | 4815.43 | 4628.56 | 1193.15 | calmodulin                               |
| TGME49_305100 | 14.12   | 17.17   | 11.87   | 13.22   | 13.11   | 13.76   | hypothetical protein                     |
| TGME49_305270 | 678.29  | 366.47  | 129.52  | 517.17  | 448.47  | 112.71  | hypothetical protein                     |
| TGME49_305460 | 968.46  | 954.01  | 493.13  | 1290.07 | 1337.73 | 131.83  | methionine aminopeptidase                |
| TGME49_305510 | 2006.35 | 1436.53 | 521.36  | 1382.98 | 1338.06 | 328.84  | hypothetical protein                     |
| TGME49_305590 | 524.56  | 324.53  | 75.50   | 420.58  | 393.91  | 68.96   | ABC transporter                          |
| TGME49_306060 | 4946.44 | 3573.39 | 1359.38 | 3330.06 | 2916.54 | 945.05  | hypothetical protein                     |
| TGME49_306230 | 99.87   | 116.00  | 46.34   | 101.55  | 96.60   | 54.02   | hypothetical protein                     |
| TGME49_306340 | 219.88  | 219.85  | 141.66  | 192.60  | 162.64  | 62.36   | dynein gamma chain                       |
| TGME49_306450 | 55.03   | 76.52   | 26.88   | 100.64  | 130.12  | 24.01   | short chain dehydrogenase family protein |
| TGME49_306510 | 21.73   | 31.15   | 25.35   | 45.44   | 38.17   | 23.28   | hypothetical protein                     |
| TGME49_306620 | 22.16   | 17.22   | 19.97   | 20.14   | 19.57   | 21.70   | AP2IX-9                                  |



|               |         |         |         |         |         |        |                                                                    |
|---------------|---------|---------|---------|---------|---------|--------|--------------------------------------------------------------------|
| TGME49_307830 | 343.87  | 470.84  | 124.99  | 384.64  | 493.22  | 157.70 | hypothetical protein                                               |
| TGME49_309860 | 116.84  | 52.17   | 49.33   | 77.51   | 74.82   | 55.63  | hypothetical protein                                               |
| TGME49_309930 | 237.61  | 188.12  | 77.51   | 229.97  | 198.61  | 43.01  | alpha-N-acetylgalactosaminidase                                    |
| TGME49_310010 | 1391.70 | 997.40  | 435.07  | 1116.54 | 1090.45 | 352.89 | sushi domain-containing protein /<br>SCR repeat-containing protein |
| TGME49_310100 | 95.94   | 70.98   | 45.94   | 83.33   | 91.29   | 30.45  | GPI mannosyltransferase 1                                          |
| TGME49_310240 | 357.89  | 258.69  | 127.90  | 287.34  | 243.44  | 126.90 | hypothetical protein                                               |
| TGME49_311100 | 1484.48 | 2194.86 | 519.27  | 1324.64 | 1298.61 | 297.51 | zinc finger (CCCH type) protein                                    |
| TGME49_311370 | 161.31  | 248.82  | 104.95  | 252.83  | 340.65  | 46.91  | methylmalonate-semialdehyde<br>dehydrogenase                       |
| TGME49_311470 | 2676.60 | 1740.74 | 734.34  | 2002.86 | 1841.29 | 595.66 | hypothetical protein                                               |
| TGME49_312150 | 2927.58 | 2105.47 | 1063.03 | 2369.09 | 2292.26 | 750.52 | hypothetical protein                                               |
| TGME49_312320 | 333.72  | 153.88  | 254.61  | 606.67  | 445.44  | 93.76  | hypothetical protein                                               |
| TGME49_312950 | 1022.19 | 598.47  | 201.27  | 746.71  | 796.70  | 211.17 | hypothetical protein                                               |
| TGME49_313050 | 83.10   | 132.45  | 51.82   | 121.98  | 86.92   | 32.15  | short-chain<br>dehydrogenase/reductase family<br>protein           |
| TGME49_313780 | 680.38  | 419.36  | 116.64  | 560.27  | 506.47  | 105.78 | hypothetical protein                                               |
| TGME49_313840 | 15.80   | 13.90   | 15.02   | 15.04   | 15.62   | 15.52  | hypothetical protein                                               |
| TGME49_314250 | 85.22   | 144.46  | 252.85  | 1197.51 | 1395.85 | 122.48 | bradyzoite rhoptry protein BRP1                                    |
| TGME49_315210 | 1524.76 | 892.99  | 257.59  | 1069.73 | 924.51  | 261.64 | rhoptry protein                                                    |
| TGME49_315220 | 1660.10 | 1150.73 | 511.66  | 1263.41 | 1127.84 | 445.50 | rhoptry protein                                                    |
| TGME49_315470 | 257.63  | 160.50  | 37.30   | 194.13  | 183.45  | 41.09  | hypothetical protein                                               |
| TGME49_315490 | 603.36  | 507.94  | 138.13  | 534.46  | 498.71  | 143.42 | hypothetical protein                                               |
| TGME49_315500 | 955.90  | 528.81  | 344.25  | 739.91  | 680.24  | 329.22 | hypothetical protein                                               |
| TGME49_315510 | 610.21  | 407.14  | 226.06  | 479.02  | 431.28  | 201.32 | hypothetical protein                                               |
| TGME49_316260 | 1871.70 | 1203.34 | 648.30  | 1672.84 | 1392.71 | 504.37 | hypothetical protein                                               |
| TGME49_316280 | 2566.93 | 1734.14 | 954.12  | 2028.30 | 1936.76 | 706.68 | hypothetical protein                                               |
| TGME49_316580 | 8.73    | 10.67   | 9.49    | 9.49    | 9.66    | 9.19   | hypothetical protein                                               |
| TGME49_318610 | 12.47   | 13.46   | 152.16  | 5568.23 | 5063.30 | 16.11  | AP2IV-3                                                            |
| TGME49_318660 | 1769.91 | 1833.42 | 641.02  | 1839.57 | 1737.06 | 415.37 | protein phosphatase 2C                                             |
| TGME49_318680 | 20.24   | 23.59   | 14.46   | 25.28   | 21.20   | 15.50  | 3',5'-cyclic-nucleotide<br>phosphodiesterase, putative             |
| TGME49_319350 | 1540.19 | 1222.50 | 507.47  | 1117.83 | 1130.46 | 428.25 | SRS domain containing protein                                      |
| TGME49_319360 | 54.62   | 181.53  | 62.29   | 189.81  | 193.86  | 62.74  | SRS17                                                              |
| TGME49_320180 | 10.39   | 11.32   | 16.44   | 13.32   | 13.55   | 33.97  | SRS16C (= BSR4, P36)                                               |

|               |         |         |        |         |         |        |                                 |
|---------------|---------|---------|--------|---------|---------|--------|---------------------------------|
| TGME49_320620 | 184.50  | 97.10   | 92.48  | 143.14  | 180.29  | 61.72  | queuine tRNA-ribosyltransferase |
| TGME49_320630 | 1400.16 | 1248.34 | 301.11 | 1056.01 | 1066.56 | 274.39 | choline kinase                  |
| TGME49_321470 | 14.71   | 14.44   | 28.51  | 16.84   | 16.76   | 32.04  | SRS12D                          |
| TGME49_321480 | 221.15  | 316.92  | 87.11  | 198.89  | 159.70  | 81.01  | SRS12B                          |

**Dataset S2 Many of the 42 mRNAs altered by the overexpression of DDHA-AP2IV-3 are highly expressed in merozoites and/or sporozoites.** Data in columns B-G are percentile values, which provides a relative comparison to all mRNAs expressed in each sample. Percentile values for columns B and C were determined in the current analysis, whereas percentiles for columns D-G were obtained from each Gene Record in ToxoDB. **ToxoDB Data sources:** column D and E are White lab microarray data from Type II ME49 tachyzoite and 48 h pH8.2 samples; column F is a RNA-seq data of CZ-H3 strain (Hehl Lab) from 3 day post-cat infection merozoites samples; column G is a RNA-seq data of a Type II M4 (Boothroyd Lab) from 10 day oocysts (sporozoites) samples. The fold change in column I was determined by comparing the RMA values from the CTG-DDHA-AP2IV-3 transgenic grown in normal pH7.0 media plus 100 nM Shield 1 divided by the CTG parent also grown in normal media plus Shield 1. All values are sorted by the highest to lowest fold increases in column I. Columns J and K indicate genes whose mRNA levels are qualitatively increased in DD-AP2IV-3 parasites and either merozoites and/or sporozoites.

| Genbank       | CTG parent pH7.0 | DDHA-AP2IV-3 plus Shield 1 pH7.0 | ME49 tachyzoite pH7.0 | ME49 bradyzoite pH8.2 | M4 merozoite pH7.0 | M4 sporozoite pH7.0 | Gene description                          | Fold change CTG parent vs DDHA-AP2IV-3 | elevated in DDHA-AP2IV-3 and merozoites | elevated in DDHA-AP2IV-3 and sporozoites |
|---------------|------------------|----------------------------------|-----------------------|-----------------------|--------------------|---------------------|-------------------------------------------|----------------------------------------|-----------------------------------------|------------------------------------------|
| TGME49_318610 | 10.3             | 97.5                             | 9.1                   | 71.5                  | 71.4               | 91.2                | AP2IV-3                                   | 446.5                                  | X                                       | X                                        |
| TGME49_314250 | 47.0             | 91.4                             | 67.6                  | 96.5                  | 97.8               | 76.9                | bradyzoite rhoptyr protein BRP1           | 14.1                                   | X                                       | X                                        |
| TGME49_259020 | 41.3             | 87.0                             | 58.1                  | 99.8                  | 13.1               | 70.0                | bradyzoite antigen (BAG1)                 | 12.5                                   |                                         | X                                        |
| TGME49_227430 | 28.0             | 58.8                             | 46.0                  | 86.7                  | 14.8               | 29.1                | hypothetical protein                      | 6.4                                    |                                         |                                          |
| TGME49_291040 | 32.1             | 53.2                             | 55.4                  | 99.7                  | 9.0                | 38.9                | lactate dehydrogenase (LDH2)              | 3.9                                    |                                         |                                          |
| TGME49_238440 | 21.2             | 43.1                             | 7.4                   | 80.9                  | 90.7               | 70.8                | SRS22A                                    | 3.8                                    | X                                       | X                                        |
| TGME49_319360 | 40.2             | 63.7                             | 23.2                  | 83.7                  | 64.3               | 36.8                | SRS17                                     | 3.5                                    | X                                       |                                          |
| TGME49_207210 | 67.2             | 87.0                             | 70.1                  | 99.9                  | 18.8               | 5.8                 | hypothetical protein (UNK)                | 3.2                                    |                                         |                                          |
| TGME49_273980 | 73.5             | 89.5                             | 33.7                  | 90.4                  | 99.9               | 5.8                 | hypothetical protein                      | 3.0                                    | X                                       |                                          |
| TGME49_208740 | 66.6             | 83.9                             | 72.6                  | 99.7                  | 15.5               | 99.7                | microneme protein (MIC UNK)               | 2.5                                    |                                         | X                                        |
| TGME49_264630 | 27.7             | 40.7                             | 27.1                  | 88.8                  | 52.4               | 72.9                | hypothetical protein                      | 2.5                                    | X                                       | X                                        |
| TGME49_252640 | 32.0             | 44.7                             | 24.9                  | 95.5                  | 4.4                | 77.4                | TgPMA1                                    | 2.5                                    |                                         | X                                        |
| TGME49_220560 | 39.7             | 54.6                             | 17.5                  | 29.2                  | 9.8                | 74.1                | hypothetical protein                      | 2.4                                    |                                         | X                                        |
| TGME49_215775 | 60.9             | 78.7                             | 99.6                  | 97.2                  | 94.6               | 87.2                | Rhoptry kinase family protein ROP8        | 2.3                                    | X                                       | X                                        |
| TGME49_274170 | 41.8             | 56.5                             | 15.0                  | 78.9                  | 90.1               | 44.6                | protein kinase                            | 2.3                                    | X                                       |                                          |
| TGME49_286000 | 41.8             | 55.7                             | 26.8                  | 67.2                  | 76.2               | 23.0                | hypothetical protein                      | 2.2                                    | X                                       |                                          |
| TGME49_306510 | 26.4             | 37.2                             | 22.2                  | 73.5                  | 57.7               | 81.1                | hypothetical protein                      | 2.1                                    | X                                       | X                                        |
| TGME49_240470 | 41.0             | 53.7                             | 19.3                  | 83.1                  | 13.6               | 66.1                | hypothetical protein                      | 2.1                                    |                                         | X                                        |
| TGME49_238210 | 56.9             | 73.2                             | 53.4                  | 85.0                  | 64.3               | 41.7                | microneme protein                         | 2.0                                    | X                                       |                                          |
| TGME49_264150 | 28.4             | 38.3                             | 17.0                  | 49.5                  | 10.8               | 5.8                 | hypothetical protein                      | 2.0                                    |                                         |                                          |
| TGME49_202020 | 72.9             | 85.3                             | 60.0                  | 94.3                  | 8.8                | 49.1                | DnaK-TPR                                  | 2.0                                    |                                         |                                          |
| TGME49_267670 | 45.0             | 58.3                             | 38.8                  | 84.7                  | 73.7               | 72.9                | hypothetical protein                      | 2.0                                    | X                                       | X                                        |
| TGME49_254890 | 41.5             | 52.9                             | 22.0                  | 72.2                  | 76.0               | 5.8                 | hypothetical protein                      | 1.9                                    | X                                       |                                          |
| TGME49_300130 | 33.5             | 41.7                             | 18.4                  | 69.5                  | 78.2               | 57.4                | apical membrane antigen                   | 1.9                                    | X                                       | X                                        |
| TGME49_267470 | 44.9             | 56.7                             | 34.2                  | 90.6                  | 94.3               | 33.0                | hypothetical protein                      | 1.9                                    | X                                       |                                          |
| TGME49_312320 | 74.4             | 84.8                             | 77.2                  | 99.2                  | N/A                | N/A                 | hypothetical protein                      | 1.8                                    |                                         |                                          |
| TGME49_268360 | 56.0             | 68.4                             | 74.4                  | 47.0                  | 12.7               | 31.3                | hypothetical protein                      | 1.7                                    | X                                       |                                          |
| TGME49_267130 | 44.6             | 54.0                             | 50.7                  | 93.8                  | 46.3               | 83.9                | SRS38A                                    | 1.7                                    |                                         | X                                        |
| TGME49_222370 | 39.3             | 47.2                             | 17.1                  | 94.0                  | 35.5               | 12.1                | SRS13                                     | 1.6                                    |                                         |                                          |
| TGME49_278975 | 29.0             | 35.0                             | 26.0                  | 92.6                  | 47.3               | 59.7                | hypothetical protein                      | 1.6                                    | X                                       | X                                        |
| TGME49_311370 | 59.0             | 69.8                             | 14.8                  | 93.1                  | 60.4               | 74.5                | methylmalonate-semialdehyde dehydrogenase | 1.6                                    | X                                       | X                                        |
| TGME49_288690 | 47.2             | 56.0                             | 16.4                  | 26.3                  | N/A                | N/A                 | DnaJ domain-containing protein            | 1.6                                    |                                         |                                          |

|               |      |      |      |      |      |      |                                   |     |   |   |
|---------------|------|------|------|------|------|------|-----------------------------------|-----|---|---|
| TGME49_208730 | 56.3 | 66.8 | 92.0 | 99.6 | 9.9  | 60.1 | hypothetical protein              | 1.6 |   | X |
| TGME49_244335 | 31.4 | 36.3 | 15.7 | 48.5 | 16.8 | 45.3 | hypothetical protein              | 1.5 |   |   |
| TGME49_277730 | 35.7 | 40.1 | 26.4 | 55.8 | 16.4 | 69.9 | hypothetical protein              | 1.5 |   | X |
| TGME49_250360 | 59.8 | 68.2 | 65.5 | 91.4 | 73.3 | 55.8 | esterase                          | 1.5 | X | X |
| TGME49_309860 | 52.5 | 45.5 | 39.8 | 86.1 | 63.0 | 86.7 | hypothetical protein              | 0.7 |   |   |
| TGME49_216620 | 80.5 | 73.5 | 69.8 | 47.2 | 28.4 | 17.7 | EF hand domain-containing protein | 0.6 |   |   |
| TGME49_243200 | 89.9 | 85.6 | 90.0 | 79.6 | 69.2 | 34.5 | hypothetical protein              | 0.6 |   |   |
| TGME49_249150 | 62.6 | 51.1 | 12.4 | 23.7 | 77.4 | 19.5 | PAN domain-containing protein     | 0.6 |   |   |
| TGME49_243470 | 64.3 | 41.9 | 37.0 | 95.7 | 42.3 | 24.5 | hypothetical protein              | 0.3 |   |   |
| TGME49_216140 | 93.5 | 17.8 | 22.1 | 96.8 | 27.3 | 54.5 | ankyrin repeat-containing protein | 0.0 |   |   |

## Dataset S3 Primer sequences

| Oligonucleotide function                                             | Gene/locus        | Orientation | Oligonucleotides (5'->3')                                   |
|----------------------------------------------------------------------|-------------------|-------------|-------------------------------------------------------------|
| <b>Tagging of endogenous gene loci with 3xHA or myc epitope tags</b> |                   |             |                                                             |
| LIC 5' primer for AP2IX-9                                            | AP2IX-9           | Forward     | TACTTCCAATCCAATTTAATGCAGTGCTTGCGGCTCTCTGATGA                |
| LIC 3' primer for AP2IX-9                                            | AP2IX-9           | Reverse     | TCCTCCACTTCCAATTTTAGCGGCTGACGTTGTTTCGCGC                    |
| LIC 5' primer for AP2IV-3                                            | AP2IV-3           | Forward     | TACTTCCAATCCAATTTAATGCACTGTCGATTGGTACCGGATCTGG              |
| LIC 3' primer for AP2IV-3                                            | AP2IV-3           | Reverse     | TCCTCCACTTCCAATTTTAGCCGCTGCGTTGTCCCCTGATGAAG                |
| <b>Overexpression construct</b>                                      |                   |             |                                                             |
| AP2IV-3 CDS cloning into pCTDDHA3                                    | AP2IV-3 CDS       | Forward     | ATTCCCGGGGCGGATGGCTCTCTAGTGAGG                              |
| AP2IV-3 CDS cloning into pCTDDHA3                                    | AP2IV-3 CDS       | Reverse     | ATTCCTGCAGGTTACGCTGCGTTGTCCCCTG                             |
| <b>AP2IX-9 knockout constructs</b>                                   |                   |             |                                                             |
| AP2IX-9B4UTR5F                                                       | 5' UTR of AP2IX-9 | Forward     | GGGGACAACCTTTGTATAGAAAAGTTGCATTTTTTAGGTTGAAGA<br>ACCGAGCAGC |
| AP2IX-9B1rUTR5R                                                      | 5' UTR of AP2IX-9 | Reverse     | GGGGACTGCTTTTTGTACAACTTGAACGGCATGGCCGAAC<br>TACG            |
| AP2IX-9B2rUTR3F                                                      | 3' UTR of AP2IX-9 | Forward     | GGGGACAGCTTTCTTGTACAAAGTGGTTAACGTGAGTTGCGC<br>AGTCTTGC      |
| AP2IX-9B3UTR3R                                                       | 3' UTR of AP2IX-9 | Reverse     | GGGGACAACCTTTGTATAATAAAGTTGCCCGCTGGAAAAAGAAA<br>GCGAC       |
| Verify AP2IX-9KO-F                                                   | AP2IX-9           | Forward     | TATGGTACCATATGGGCCACACGCTTTGGGTTCTTAG                       |
| Verify AP2IX-9KO-R                                                   | AP2IX-9           | Reverse     | ATAAAGCTTGGTGAGGATGTCTGTTTCATG                              |
| <b>AP2IV-3 knockout constructs</b>                                   |                   |             |                                                             |
| AP2IV-3B4UTR5F                                                       | 5' UTR of AP2IV-3 | Forward     | GGGGACAACCTTTGTATAGAAAAGTTGGGCTTCTTTGCAAAAAGA<br>CTGACCTC   |
| AP2IV-3B1rUTR5R                                                      | 5' UTR of AP2IV-3 | Reverse     | GGGGACTGCTTTTTGTACAACTTGGACAGTAGCAGACGGCG<br>AAAGTT         |
| AP2IV-3B2rUTR3F                                                      | 3' UTR of AP2IV-3 | Forward     | GGGGACAGCTTTCTTGTACAAAGTGGATTTTTGTTAACCGGCAT<br>CTTCGTTTCG  |
| AP2IV-3B3UTR3R                                                       | 3' UTR of AP2IV-3 | Reverse     | GGGGACAACCTTTGTATAATAAAGTGGACACGAAACATAAGACA<br>GTCAGGATCAG |
| Verify AP2IV-3KO-F                                                   | AP2IV-3           | Forward     | CGTCTTTTAGTTCTAACTCCCGCACG                                  |
| Verify AP2IV-3KO-R                                                   | AP2IV-3           | Reverse     | GGCTCCTTCATGGACAAAACCCTT                                    |
| <b>Guide RNA constructs</b>                                          |                   |             |                                                             |

|              |         |         |                                            |
|--------------|---------|---------|--------------------------------------------|
| AP2IX-9gRNA1 | AP2IX-9 | Forward | CGGCGGAGCGGCATTCGCTTTGGgtttagagctagaaatagc |
| AP2IX-9gRNA2 | AP2IX-9 | Forward | CGGTTGGTTCGTCAAACGCGGGGgtttagagctagaaatagc |
| AP2IX-9gRNA3 | AP2IX-9 | Forward | CGACGTCACCAATCAAGCGTgtttagagctagaaatagc    |
| AP2IX-9gRNA4 | AP2IX-9 | Forward | CCTGGCGGGAAAGAAAACCTCGGgtttagagctagaaatagc |
| AP2IV-3gRNA1 | AP2IV-3 | Forward | CTCGCCGTGGTAATTTGTCTgtttagagctagaaatagc    |
| AP2IV-3gRNA2 | AP2IV-3 | Forward | CCACGAACGCTCTAACGTTGgtttagagctagaaatagc    |

#### Target regions for ChIP-qPCR

|           |                  |         |                       |
|-----------|------------------|---------|-----------------------|
| ChIP-qPCR | BAG1 region<br>1 | Forward | GCCAGTCGAAAGCCATTAA   |
| ChIP-qPCR | BAG1 region<br>1 | Reverse | TCACGCGTTCCTGCTACTC   |
| ChIP-qPCR | BAG1 region<br>2 | Forward | CGTCTCTCTGTCCACGAAC   |
| ChIP-qPCR | BAG1 region<br>2 | Reverse | ATGGGGAACTGGAGGAAGAT  |
| ChIP-qPCR | BAG1 region<br>3 | Forward | AGGTCGCCCCGTCTTATTCTT |
| ChIP-qPCR | BAG1 region<br>3 | Reverse | ACCCAAACATGGAGTTCAGG  |
| ChIP-qPCR | BAG1 region<br>4 | Forward | GACGAGTTCCCGTTTTTCCT  |
| ChIP-qPCR | BAG1 region<br>4 | Reverse | ACAGAGGTCGCTGCGTAGAC  |
| ChIP-qPCR | BAG1 region<br>5 | Forward | CTTTTGCCAAAGGAGACCTG  |
| ChIP-qPCR | BAG1 region<br>5 | Reverse | ATGCCACTGAGCTACACACG  |
| ChIP-qPCR | BAG1 region<br>6 | Forward | GTCGTCTGTGAGAGCGTCAA  |
| ChIP-qPCR | BAG1 region<br>6 | Reverse | GACCTGGGCTTTGCAGATAA  |

### Dataset S3 Transgenic strains

| Published parent and transgenic strains used in this study |                                                       |               |
|------------------------------------------------------------|-------------------------------------------------------|---------------|
| Designated name in this study                              | Genotype                                              | Reference     |
| Prugniaud (Pru)                                            | Type II strain with $\Delta h x g p r t$              | Martrou, 1965 |
| Prugniaud- $\Delta ku80$ (PruQ)                            | Type II strain with $\Delta h x g p r t, \Delta ku80$ | Fox, 2011     |
| CTG                                                        | Type III strain                                       | ATCC#: 50842  |

| Transgenic strains produced for this study |                                               |                                                   |                                            |                 |         |
|--------------------------------------------|-----------------------------------------------|---------------------------------------------------|--------------------------------------------|-----------------|---------|
| Name in this study                         | experimental use                              | Parent strain source for producing the transgenic | Transgene/selectable marker                | Drug Selection  | Clone # |
| PruQ-AP2IV-3HA                             | endogenous expression of AP2IV-3              | PruQ                                              | endogenous promoter::AP2IV-3(3xHA)/DHFR-TS | pyrimethamine   | D8      |
| PruQ-AP2IX-9myc-AP2VI-3HA                  | endogenous expression of AP2IX-9              | PruQ-AP2IV-3HA                                    | endogenous promoter::AP2VI-1(3xHA)/DHFR-TS | pyrimethamine   | A2, A3  |
| CTG- <sup>DD</sup> AP2IV-3                 | conditional expression of AP2IV-3             | CTG                                               | tub::(DD-3xHA)-AP2IV-3/sagCAT              | chloramphenicol | C4, D4  |
| CTG-BAG1-Luc                               | expressing BAG1::firefly luciferase transgene | CTG                                               | PC3                                        | pyrimethamine   | A4, B2  |
| CTG- <sup>DD</sup> AP2IV-3-BAG1-Luc        | expressing BAG1::firefly luciferase transgene | CTG-DDAP2IV-3                                     | PC3                                        | pyrimethamine   | A3, C5  |
| Pru- $\Delta ap2IV-3$                      | knockout of AP2IV-3                           | Pru                                               | 3Frag-AP2IV-3KO/DHFR-TS                    | pyrimethamine   | A9, A10 |
| Pru- $\Delta ap2IX-9$                      | knockout of AP2IX-9                           | Pru                                               | 3Frag-AP2IX-9KO/DHFR-TS                    | pyrimethamine   |         |
| CTG- $\Delta ap2IV-3$                      | knockout of AP2IV-3                           | CTG                                               | 3Frag-AP2IV-3KO/DHFR-TS                    | pyrimethamine   | A3, A6  |
